# A Universal Method for Crossing Molecular and Atlas Modalities using Simplex-Based Image Varifolds and Quadratic Programming

Kaitlin M. Stouffer<sup>1\*</sup>, Alain Trouvé<sup>2</sup>, Laurent  
Younes<sup>3</sup>, Michael Kunst<sup>4</sup>, Lydia Ng<sup>4</sup>, Hongkui Zeng<sup>4</sup>, Manjari  
Anant<sup>1</sup>, Jean Fan<sup>1</sup>, Yongsoo Kim<sup>5</sup> and Michael I. Miller<sup>1\*</sup>

<sup>1\*</sup>Department of Biomedical Engineering, Johns Hopkins  
University, Baltimore, MD, USA.

<sup>2</sup>Centre Borelli, ENS Paris-Saclay, Gif-sur-yvette, France.

<sup>3</sup>Department of Applied Mathematics and Statistics, Johns  
Hopkins University, Baltimore, MD, USA.

<sup>4</sup>Allen Institute for Brain Science, Seattle, WA, USA.

<sup>5</sup>Department of Neural and Behavioral Sciences, Penn State  
University, College of Medicine, State College, PA, USA.

\*Corresponding author(s). E-mail(s): [kstouff4@jhmi.edu](mailto:kstouff4@jhmi.edu);  
[mim@jhu.edu](mailto:mim@jhu.edu);

Contributing authors: [alain.trouve@ens-paris-saclay.fr](mailto:alain.trouve@ens-paris-saclay.fr);  
[laurent.younes@jhu.edu](mailto:laurent.younes@jhu.edu); [michael.kunst@alleninstitute.org](mailto:michael.kunst@alleninstitute.org);  
[LydiaN@alleninstitute.org](mailto:LydiaN@alleninstitute.org); [HongkuiZ@alleninstitute.org](mailto:HongkuiZ@alleninstitute.org);  
[manant1@jhmi.edu](mailto:manant1@jhmi.edu); [jeanfan@jhu.edu](mailto:jeanfan@jhu.edu); [yuk17@psu.edu](mailto:yuk17@psu.edu);

## Abstract

This paper explicates a solution to the problem of building correspondences between molecular-scale transcriptomics and tissue-scale atlases. The central model represents spatial transcriptomics as generalized functions encoding molecular position and high-dimensional transcriptomic-based (gene, cell type) identity. We map onto low-dimensional atlas ontologies by modeling each atlas compartment as a homogeneous random field with unknown transcriptomic feature distribution. The algorithm presented solves simultaneously for the minimizing geodesic diffeomorphism of coordinates and latent atlas transcriptomic feature

047 fractions by alternating LDDMM optimization for coordinate trans-  
048 formations and quadratic programming for the latent transcriptomic  
049 variables. We demonstrate the universality of the algorithm in mapping  
050 tissue atlases to gene-based and cell-based MERFISH datasets as well as  
051 to other tissue scale atlases. The joint estimation of diffeomorphisms and  
052 latent feature distributions allows integration of diverse molecular and  
053 cellular datasets into a single coordinate system and creates an avenue of  
054 comparison amongst atlas ontologies for continued future development.

055 **Keywords:** Image Varifold, Spatial Transcriptomics, Atlas Mapping,  
056 Multi-scale

## 060 1 Introduction

061 Since the 17th century, scientists have seen living organisms as a hierarchy  
062 of biological mechanisms at work across scales. To understand the interplay  
063 of these mechanisms, reference atlases that incorporate genetic, cellular, and  
064 connectivity measures into a single coordinate space have been constructed  
065 and which aim to summarize the mass of data across scales through a set  
066 of discrete partitions. An instance of the more general segmentation problem  
067 in computer vision, atlas construction relies on the underlying assumption of  
068 homogeneity within each region. The optimal partitioning assigns a label to  
069 each region based on this homogeneity and the presence of sharp changes at  
070 the boundaries between regions.

071 In biology, this label frequently reflects behavior or function, as seen in two  
072 of the most common mouse brain atlases: the Allen Reference Atlas (ARA)  
073 [1] and the Franklin and Paxinos Atlas [2]. Together, the common coordinate  
074 framework an atlas provides in addition to its ontology have guided research  
075 efforts in facilitating the comparison of different types or replicates of data in  
076 a single coordinate system and in honing efforts of study to particular regions  
077 relevant to each unique investigation.

078 The widespread use of these atlases, particularly in the fields of digital  
079 pathology and neuroimaging, has motivated efforts to develop image registra-  
080 tion tools to align individual images to such reference atlases. A large family  
081 of methods, all diffeomorphism based [3], have been developed within the field  
082 of Computational Anatomy (CA) [4, 5] for transforming coordinate systems  
083 at the tissue scales. These come particularly from multiple labs in the mag-  
084 netic resonance imaging (MRI) community [6, 7, 8, 9, 10, 11, 12, 13, 14]. More  
085 recently, Molecular CA [15] has emerged which unifies the dense tissue scales  
086 of MRI with high resolution micron scales of digital pathology imagery. These  
087 approaches are hierarchical [16], constructing what are termed image varifold  
088 representations, which are geometric measures of the brain existing at multi-  
089 ple scales, and therefore allowing for the simultaneous representation of both  
090 micron scale particle phenomena, such as the transcriptional or cell type data

studied herein, and millimeter scale tissue phenomena, as traditionally studied in CA.

A central challenge that remains within these representations is the necessity of crossing between those reflecting different imaging modalities and therefore different functional range spaces, which exist at different scales. In the setting of classical images on a regular grid, this challenge has been addressed through different approaches including matching based on analytical methods using cross-correlation [17] or localized texture features [18], and methods for transforming one range space to another in crossing modalities and scales based on polynomial transformations [19], scattering transforms [20] and machine learning [21, 22, 23]. More recently, methods in deep learning have also been applied to align single-cell datasets, modeled as regular grid images, both to atlases at the histological scale [24] as well as reference transcriptional atlases that are beginning to emerge [25].

We should however expect even more diversity in the types and scales of data that can be measured with the rapidly developing technologies in imaging and spatial transcriptomics. These aim to detect up to thousands of genes simultaneously with spatial information, and thus, allow us to view both the micro and even nanometer scales with exquisite detail [26]. Both the diversity and magnitude of this data pushes the limits of our ability to model such datasets as classical continuous images, discretized on regular grids. Indeed, as seen in those repositories generated in the BRAIN Initiative Cell Census Network (BICCN) and archived at the Brain Image Library (BIL), these datasets are already on the order of terabytes and will only continue to increase as technologies shift from mouse to human measurements. Hence, the need remains for a modeling framework equally equipped to represent datasets in both forms of traditional continuous imagery sampled on a regular grid, and those of discrete particles with attached functional description; and for an associated registration mechanism to align objects in this framework across different functional modalities at different scales.

This paper focuses on the use of mesh-based image varifolds, as described in [27], for simultaneously modeling molecular and tissue scale data. A sub-problem covered by the mesh based image-varifold theory outlined in [27] is the mapping of molecular scale data to atlas coordinate systems. Image varifolds are geometric measures [15], which allow us to provide a single representation that supports molecular transcriptomics measurements, cell-based measurements, and tissue scale atlases. We explicate, here, the construction of a universal method rooted in this framework for transferring molecular scale data to tissue scale “cartoon” atlases, which are devoid of gene measurements, and rather, only contain a fixed partition into structures in their description.

Our solution couples coordinate system transformation via geodesic generation of minimal energy diffeomorphisms to estimation of a family of probability laws, which give for each atlas label, a distribution over molecular features that is the most reasonable explanation of the target transcriptomic dataset. Specifically, we model each atlas region as homogeneous and stationary with respect

139 to space, giving an optimal alignment between atlas and target that maximizes  
140 similarity in distribution over features across each site in a single atlas region  
141 while minimizing the energy of the geometric deformation (diffeomorphism).  
142 This consequently skews emphasis away from the foreground-background  
143 boundaries that almost exclusively govern image alignment and instead high-  
144 lights the underlying assumptions in the architecture of the cartoon atlas,  
145 whose boundaries were initially constructed so as to maximize the homogene-  
146 ity of the region. We estimate the diffeomorphism and probability laws jointly  
147 via an alternating algorithm, as explicated here, that iterates large deformation  
148 diffeomorphic metric mapping (LDDMM) with quadratic programming  
149 for minimizing the normed distance between the template and target, and as  
150 a result, yields both spatial alignment and functional correspondence between  
151 template and target.

152 We demonstrate the efficacy of this methodology in mapping 2D sections  
153 of the ARA [1] to corresponding sections of both cell-independent and cell-  
154 based spatial transcriptomics datasets, both generated via the MERFISH  
155 imaging-based spatial transcriptomics technology, which yields single molecule  
156 resolution. We present methods for sparsifying the functional transcriptome  
157 descriptions via gene selection based on mutual information with spatially dis-  
158 criminating variables and subsequently illustrate the stability of our estimated  
159 diffeomorphisms to choices of subsets of features. Finally, given the plethora of  
160 existing reference atlases, each of which might define a different partitioning  
161 scheme over the same area of tissue, questions of comparison and relevance of  
162 each atlas to emerging molecular and cellular signatures naturally arise [28].  
163 We show through the use of our methodology to map not just atlas to molec-  
164 ular dataset, but one atlas to another, that the correspondence yielded by our  
165 method serves as an anchor for re-examining existing ontologies and creating  
166 new ones for the future.

167

## 168 2 Results

169

### 170 2.1 Image Varifolds and Transformations for Molecular 171 Scales Based on Varifold Norms

172

173 In Computational Anatomy, correspondence between tissue sections is com-  
174 puted using coordinate transformation between the sections by solving an  
175 optimization problem characterized by the set of possible transformations to  
176 optimize the image similarity function that specifies the alignment of the  
177 sections. These transformations are modeled as affine motions and diffeomor-  
178 phisms  $\varphi$  which act to generate the space of all configurations. For classical  
179 images such as for MRI, LDDMM [29] uses the action of diffeomorphisms on  
180 images  $I$  as classical functions using function composition on the right with  
181 the inverse of the diffeomorphism:  $\varphi \cdot I(x) = I \circ \varphi^{-1}(x)$  for  $x \in R^d$ . The image  
182 similarity function used is often a norm on functions, and solving the prob-  
183 lem of minimization of the norm in the space of diffeomorphisms gives the

184



metric theory of LDDMM for generating geodesic matching between exemplar anatomies [30, 31].

Spatial transcriptomics generates measurements that while often represented as regular lattice images, are fundamentally lists of point measurements across the different technologies and thus, often dispersed irregularly over space. In spot-resolution technologies including Visium, DBiTseq, and SlideSeq, these point measurements are the magnitudes of gene expression in the neighborhood of each “spot”, which could be placed in a regular grid pattern. In contrast, in imaging-based spatial transcriptomics technologies including STARmap, Barseq, SeqFISH, and MERFISH, as illustrated here, these point measurements are single mRNA molecules or single cells, therefore dispersed in space according to the given tissue architecture and instantaneous cell dynamics measured. In both cases, we can represent these point measurements as “particles”.

Natural fluctuation in gene expression over time and space coupled to the dynamics of each spatial transcriptomics technology leads each tissue section, at the molecular (1-100 micron) scale, to have a varying number of such particles with no natural ordering of particles consistently apparent between sections. To build correspondences between these datasets of point measures, we unify the molecular scales with image-like functions as has been developed for building correspondences at tissue scales in MRI [4]. For this we represent the particles as “generalized functions” [15]. Since they carry gene or cell image data we call them image varifolds [27], linking to the rich literature on the geometric measure theory of varifolds. This allows us to represent particle clouds at any scale in both spatial and imaging function dimensions. We note landmark-based methods [32] that assume direct permutation correspondence between particles across images are not applicable, as a MERFISH section may have 100,000 particles requiring an unfathomable number of permutations to specify.

Varifolds are defined as follows. We consider a Euclidean space in  $d$  dimensions with  $d = 2, 3$ , to which we add function dimensions represented by a set  $\mathcal{F}$ . In spatial transcriptomics datasets, the functional dimensions represent the gene types of detected mRNA transcripts, treated as independent measures or aggregated into cells or small neighborhoods. At the finest scale, we model a discrete set of point measures (particles) reflecting the individual reads recorded by the given technology, whether they be single transcripts or distributions of transcripts in a given cell or neighborhood. To a single read  $(x_i, f_i) \in \mathbb{R}^d \times \mathcal{F}$ , we associate the elementary “Dirac” measure,  $\delta_{x_i} \otimes \delta_{f_i}$ , which acts on a set  $A \in \mathbb{R}^d \times \mathcal{F}$  as  $\delta_{x_i} \otimes \delta_{f_i}(A) = 1$  if  $(x_i, f_i) \in A$  and 0 otherwise. The point measures carry weights  $w_i$ , giving the multiplicity, typically as number of transcripts or number of cells measured by each individual read. The discrete image varifold is defined as the weighted sum of Diracs representative

185  
186  
187  
188  
189  
190  
191  
192  
193  
194  
195  
196  
197  
198  
199  
200  
201  
202  
203  
204  
205  
206  
207  
208  
209  
210  
211  
212  
213  
214  
215  
216  
217  
218  
219  
220  
221  
222  
223  
224  
225  
226  
227  
228  
229  
230

of the collection of particles and functional features  $(w_i, x_i, f_i), i = 1, 2, \dots$ :

$$\mu = \sum_{i \in I} w_i \delta_{x_i} \otimes \delta_{f_i} . \quad (1)$$

While for the molecular scales, each data point is a measurement of a single mRNA transcript or local (e.g. cell's) distribution on the feature space of gene type  $\mathcal{F}$ , in contrast, a data point in a given atlas is interpreted as a single voxel with a label prescribed to it from the overall ontology,  $\mathcal{L}$ .

It is natural to associate a density in mass per unit volume to the varifold through the classical decomposition of measures as a product. This gives the marginal distribution  $\rho$  on physical space,  $\rho(A) = \mu(A \times \mathcal{F}), A \subset \mathbb{R}^d$ , and the field of conditional probability measures over the feature space  $\mu_x, x \in \mathbb{R}^d$  on  $\mathcal{F}$  the feature space:

$$\mu(dx, df) = \rho(dx) \mu_x(df) . \quad (2)$$

For molecular scales,  $\rho(\cdot)$  on  $\mathbb{R}^d$  is typically the spatial distribution of total gene expression, while for atlas images at tissue scales, it is a continuous uniform distribution over the support of the tissue. Cross-modality mappings from molecular to tissue scales thus imbue the atlases with estimates  $\rho(\cdot)$  and the field of conditional probabilities  $\mu_x(\cdot), x \in \mathbb{R}^d$  of the molecular feature space (e.g. gene type).

## 2.2 Quadratic Program for Cross Modality Mapping on Meshes

A central goal is to imbue the atlas with molecular or cellular information by estimating a cross-modality mapping between the atlas and a finer scale, single-cell or subcellular dataset, such as those emerging particularly from imaging-based spatial transcriptomics technologies. To compute this mapping, we model each modality as an image varifold, a product of measures over physical and feature space, by instantiating each measurement as a triangulated or simplex mesh following [27]. Each mesh carries a collection of vertices  $\mathbf{x} = (x_i \in \mathbb{R}^2)_{i \in I}$ . From the vertices we construct the simplex triangles  $\gamma_j(\mathbf{x})$  and their centroids  $m_j(\mathbf{x})$  for  $j \in J$ , with vertex numbers  $|I|$  and simplices  $|J|$  determined by the resolution selected.

We denote the target mesh as  $\tau$  throughout the paper; see Section 4.1 for detailed construction. We note the triangles and centers are a function of the underlying vertices, but we will often suppress their explicit dependence except when necessary. To complete the image varifold we append to the mesh  $\tau$  the density  $\alpha = (\alpha_j)_{j \in J}$  and the field of probability laws  $\zeta = (\zeta_j)_{j \in J}$  on  $\mathcal{F}$ :

$$\mu_\tau = \sum_{j \in J} \alpha_j |\gamma_j| (\delta_{m_j} \otimes \zeta_j) . \quad (3)$$

Importantly, in spite of the apparent differences between equations (1), (2) and (3), they all belong to the same category of mathematical objects, and can be addressed together in the framework of image varifolds.

At the molecular scales presented in this paper, the density is number of cells or number of mRNA transcripts per  $\text{mm}^2$  and is defined for each simplex, area  $|\gamma_j|$ , as

$$\alpha_j = \rho(\gamma_j)/|\gamma_j|. \quad (283)$$

The field  $\zeta_j, j \in J$  are probabilities over genes or cell types with finite dimensional feature spaces  $f \in \mathcal{F}$ , with  $|\mathcal{F}| \simeq 1000$  in the case of genes and  $|\mathcal{F}| < 50$  for cell types. Each  $\zeta_j(f)$  is a probability of gene or cell type, with  $\sum_{\mathcal{F}} \zeta_j(f) = 1$ , indexed by location in the image.

We take the ARA [1] as the template to be mapped onto the molecular data. For mapping the atlas to molecular scales, we have to estimate both the diffeomorphisms  $\varphi : \mathbb{R}^d \rightarrow \mathbb{R}^d$  transforming atlas coordinates. as well as the unknown densities and conditional feature distributions,  $\alpha^\pi, \zeta^\pi$  which we take as latent variables for the atlas. We denote the mesh for the template as  $\tau_0$  representing its vertices  $\mathbf{x}^0 = (x_i)_{i \in I_0}$  and simplices and centers  $(\gamma_j, m_j), j \in J_0$ .

The atlas carries a finite ontology,  $\mathcal{L}$ , dividing it into disjoint spatial partitions. We model each atlas region as having a distribution (non-normalized) over the molecular features  $(\pi_\ell)_{\ell \in \mathcal{L}}$  on  $\mathcal{F}$  viewed as latent variables that are homogeneous across the partition region. The simplex law is determined by the contribution of each ontology region to the vertex for  $j \in J_0$ , given by the mixture distribution  $p_j(\ell), \sum_{\mathcal{L}} p_j(\ell) = 1$ . The atlas has appended the molecular feature space estimated from the target  $(\alpha^\pi, \zeta^\pi)$  and is given as:

$$\mu_{\tau_0}^\pi = \sum_{j \in J_0} \alpha_j^\pi |\gamma_j| (\delta_{m_j} \otimes \zeta_j^\pi) \quad (4a)$$

$$\text{with } \begin{cases} \zeta_j^\pi = \frac{1}{\alpha_j^\pi} \sum_{\ell \in \mathcal{L}} p_j(\ell) \pi_\ell \\ \alpha_j^\pi = \sum_{\ell \in \mathcal{L}} p_j(\ell) \pi_\ell(\mathcal{F}) \end{cases} .$$

The group action carrying the atlas onto the target becomes

$$\varphi \cdot \mu_{\tau_0}^\pi = \sum_{j \in J_0} \alpha_j^\pi |D\varphi|_{m_j} |\gamma_j| (\delta_{\varphi(m_j)} \otimes \zeta_j^\pi) . \quad (4b)$$

Here,  $|D\varphi|_{m_j}$  is the Jacobian determinant of  $\varphi$  at  $m_j$ .

Figure 1 shows a mesh-based image varifold for two coronal sections ( $Z = 385, Z = 485$ ) of the Allen Atlas, with finest granularity ontology ( $|\mathcal{L}| \approx 700$ ) and with meshes rendered at  $50 \mu\text{m}$  resolution. The right panel of Figure 1 illustrates the physical densities  $\alpha_j, j \in J$  of mRNA transcripts per  $\text{mm}^2$  in coronal sections of MERFISH from the Allen Institute [33].

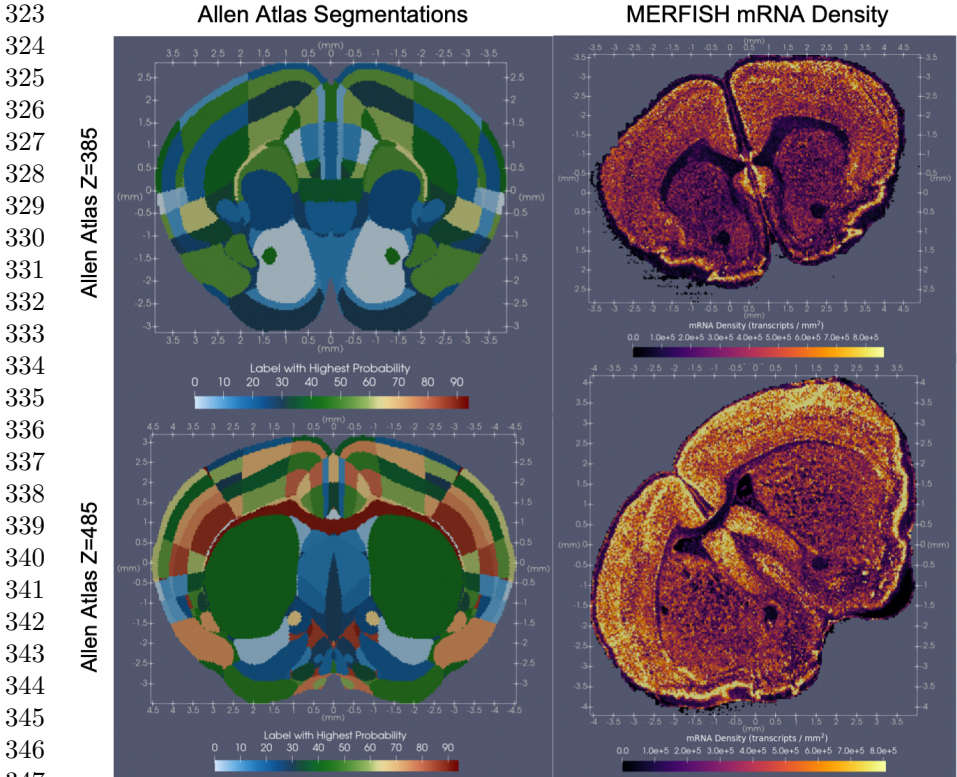

348 **Fig. 1** Coronal sections of mouse brain rendered as mesh from Allen Reference Atlas (left)  
349 and MERFISH-spatial transcriptomics (right). Selected sections of atlas chosen by visual  
350 inspection to match MERFISH architecture. Meshes are rendered at 50  $\mu\text{m}$ , with tissue  
351 sections corresponding to Z-sections 385 (top row) and 485 (bottom row) in 10  $\mu\text{m}$  Allen  
352 reference atlas. Colors in the left column indicate a region in the Allen ontology, while  
353 colors in the right column indicate the density of mRNA transcripts given by the number of  
354 transcripts per simplex area  $\alpha_j = \# \text{ transcripts} / |\gamma_j|$ .

355 To map the mRNA measures to atlases we follow [27] and define the space  
356 of image varifolds  $\mu \in W^*$  to have a norm  $\|\cdot\|_{W^*}$ , and transform the atlas  
357 coordinates onto the targets to minimize the norm. The space of varifold norms  
358 is associated to a reproducing kernel Hilbert space [34, 15] (see (7) below)  
359 defined by the inner-product of the space as  $\langle \mu, \nu \rangle_{W^*}$ ,  $\|\mu\|_{W^*}^2 = \langle \mu, \mu \rangle_{W^*}$ .

360 The mapping variational problem constructs  $\varphi : \mathbb{R}^d \rightarrow \mathbb{R}^d$  and feature  
361 laws  $(\pi_\ell)_{\ell \in \mathcal{L}}$  on  $\mathcal{F}$  to carry  $\varphi_1 \cdot \mu_{\tau_0}^\pi$  onto  $\mu_\tau$  minimizing the normed difference.  
362 Densities that are estimated are constrained to fall in the range  $0 \leq \alpha^{min} \leq$   
363  $\alpha_j^\pi \leq \alpha^{max} < \infty$  to ensure positive values for the density and incorporate prior  
364 knowledge of cellular or molecular distributions.

365  
366  
367  
368

Variational Problem 1

$$\inf_{\substack{v \in L^2([0,1],V), \\ \pi_\ell, \ell \in \mathcal{L}}} \frac{1}{2} \int_0^1 \|v_t\|_V^2 dt + \|\varphi_1 \cdot \mu_{\tau_0}^\pi - \mu_\tau\|_{W^*}^2 \quad (5)$$

with  $\begin{cases} \dot{\varphi}_t = v_t \circ \varphi_t, & \varphi_0 = Id \\ \alpha^{min} \leq \alpha_j^\pi \leq \alpha^{max}, & j \in J_0. \end{cases}$

Throughout, we take  $\alpha^{min}$  to be the 5th percentile of values of  $(\alpha_j)_{j \in J}$  in the target.

The variational problem maximizes the overlap of homogeneous regions in the atlas (e.g. each partition in the ontology) with those in the target (e.g. regions where conditional feature distributions are stationary over space) by deforming coordinates using LDDMM to optimize the vector field  $v_t, t \in [0, 1]$ . The quadratic programming calculations solve for  $\pi_\ell, \ell \in \mathcal{L}$  for the atlas to gene expression and cell-type problem and are described in the methods section 4.3.

Figure 2 illustrates the results of mapping the Allen Atlas coronal sections to Allen MERFISH spatial transcriptomics sections, shown in Figure 1. Allen Atlas sections were chosen based on correspondence through visual inspection. Estimated mRNA densities,  $\alpha_j^\pi = \bar{\pi}_j(\mathcal{F})$ , as depicted on left and middle columns, were achieved through solution of the quadratic program as defined in (9), and reflect total mRNA densities from a full set of 702 genes as features. Leftmost column shows estimated mRNA densities on transformed geometry of atlas mesh under the action of the diffeomorphism  $\varphi$ , while middle column shows estimated mRNA densities on original atlas geometry. Right column shows the action of the diffeomorphism  $\varphi$  on each atlas section, with vertex positions,  $\varphi(x^0)$ , and with approximate determinant jacobian,  $|D\varphi|_{m_j}$  indicated by the color at each simplex site  $j \in J_0$ .

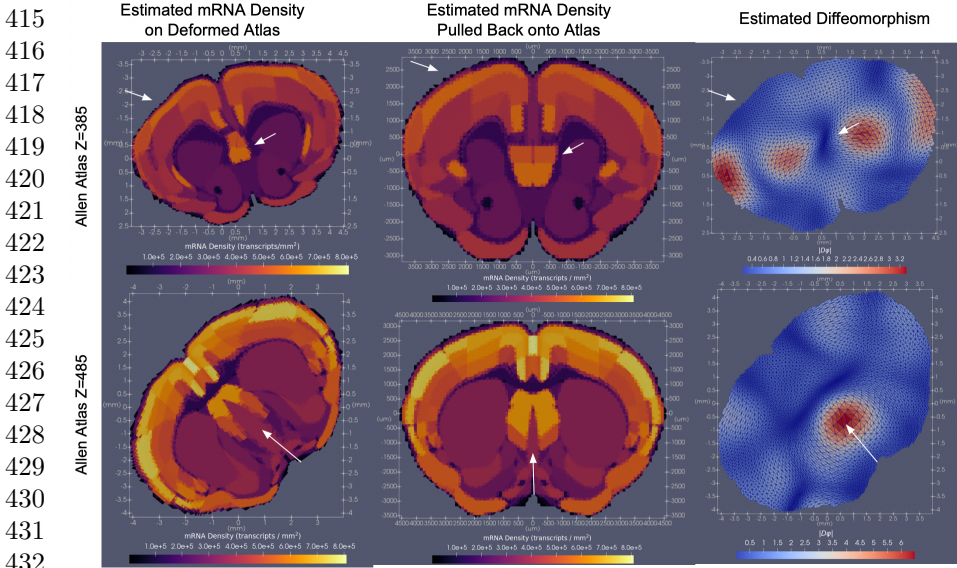

433 **Fig. 2** Results of cross-modality atlas mapping to Allen MERFISH spatial transcriptomics  
434 [33] for coronal sections of tissue at approximate Allen atlas Z-sections of 385 (top) and 485  
435 (bottom). Left column shows estimated mRNA densities,  $\alpha_j^\pi = \bar{\pi}_j(\mathcal{F})$ ,  $j \in J_0$ , per deformed  
436 simplex site under the action of the diffeomorphism of atlas to target space  $\varphi_1 \cdot \mu_{\tau_0}^\pi$ ; middle  
437 column shows the same pulled back onto original atlas geometry  $\mu_{\tau_0}^\pi$ ; right column shows  
438 the diffeomorphism applied to the mesh  $\tau_0$ , with depicted approximation of the determinant  
439 of the Jacobian  $|D\varphi_1|_{m_j}$ ,  $j \in J_0$ , as described in Section 4.3.

## 440 2.3 Dimension Reduction of Gene Distributions via 441 Mutual Information 442

443 In mapping atlases to distributions of mRNA, we are typically interested not  
444 just in overall mRNA density, but the distribution of expression across a partic-  
445 ular set of genes. The size of the total gene set measured varies across  
446 technologies, ranging from hundreds to tens of thousands of different genes  
447 [26]. However, both computational time and memory frequently dictate the  
448 analysis of only a subset of these genes at a time, together with their rel-  
449 evance to each particular application. A common selection mechanism is to  
450 consider those genes that are most “spatially variable” [35] or “differentially  
451 expressed” [36], under the assumption that expression pattern thereby varies  
452 per biologically different regions of tissue. This is particularly relevant, here,  
453 in the context of mapping spatial transcriptomics to atlases where we aim to  
454 estimate distributions over genes for each region in our atlas that we assume  
455 is homogenous within the region.

456 Various methods have been described for identifying which genes in a  
457 spatial transcriptomics dataset are more spatially varying than others, some  
458 examples being Gaussian process registration, Laplacian Score, [35] and  
459 Moran’s I [37]. In order to score genes which are most spatially varying we  
460



introduce Mutual Information scoring which assesses the differential expres- 461  
sion of genes in space in a cell-independent manner. Specifically, we score each 462  
gene with the mutual information between the two random variables  $X, M$  463  
which capture, respectively, an orientation in space and a relative density of 464  
mRNA expression for that gene (see Section 4.4). In the case of serial sections, 465  
as in the MERFISH data from the Allen Institute, each gene is assigned a score 466  
per section, with tallies taken across all sections to deduce which genes are 467  
most spatially variable across the entire brain. We note this approach is sim- 468  
ilar in spirit but not identical to that in [36] which uses the Kullback-Leibler 469  
divergence to find genes with differential expression across cells distributed in 470  
space. 471

Shown in Figure 3 is a single section of Allen Institute MERFISH data 472  
depicting the distribution of three example genes with the lowest mutual 473  
information scores (top row, *Chodl*, *Brs3*, *Hpse2*) and the highest mutual infor- 474  
mation scores (middle row, *Gfap*, *Trp53i11*, *Wipf3*) computed across the whole 475  
set of 60 serial sections. In each case, conditional probabilities,  $\zeta_j(\cdot)$  reflect the 476  
relative occurrence of each gene in the context of a subset of 20 total genes 477  
of either lowest (top row) or highest (middle row) mutual information. In line 478  
with expectations, 75% of the genes comprising those with scores in the bot- 479  
tom 25% of the total 700 genes were decoy genes (e.g. ‘BLANK’) without 480  
biological meaning but used as controls for assuring the quality of the dataset. 481

482  
483  
484  
485  
486  
487  
488  
489  
490  
491  
492  
493  
494  
495  
496  
497  
498  
499  
500  
501  
502  
503  
504  
505  
506



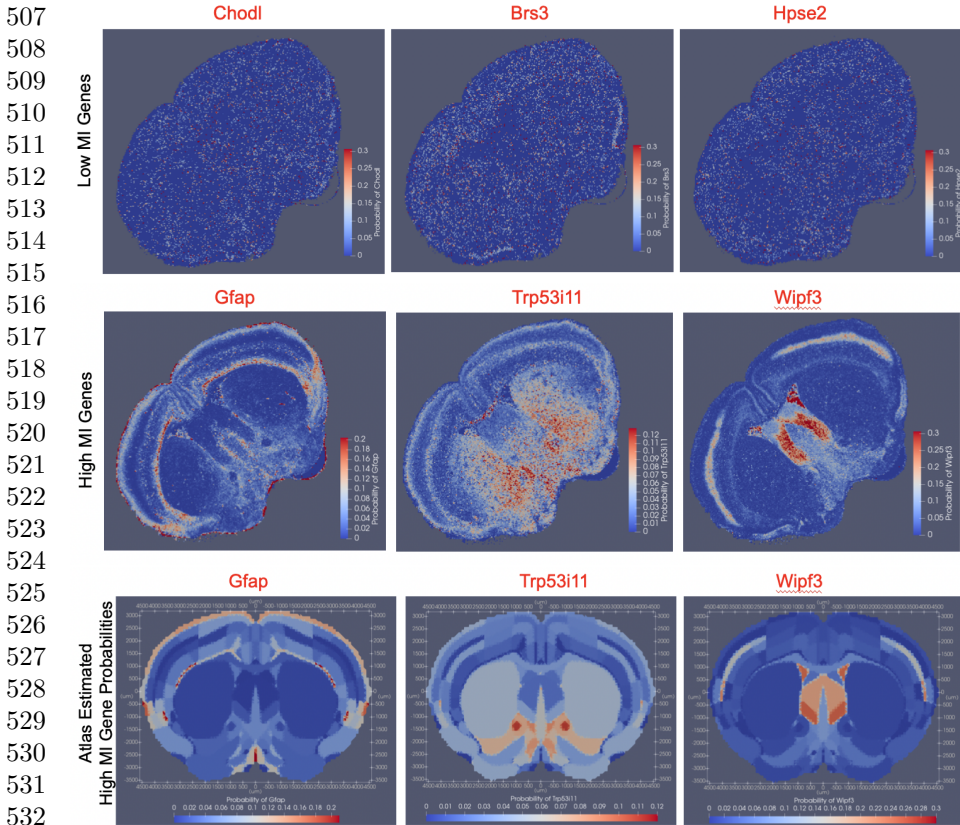

**Fig. 3** Relative expression per simplex,  $\zeta_j(\cdot)$ , of three genes with lowest (top row) and highest (middle row) mutual information score, computed across the entire set of 60 coronal sections in Allen Institute MERFISH sample, and shown on one section at approximately the coronal slice level of  $Z = 485$  in the Allen atlas. Estimated probabilities  $\zeta_j^\pi(\cdot)$  for each of the three genes with highest mutual information (*Gfap*, *Trp53i11*, *Wipf3*) shown for each atlas region with the native atlas geometry (bottom row).

Shown in the bottom row of Figure 3 is the estimated probability,  $(\zeta_j^\pi)_{j \in J_0}$ , for each of the three genes with highest mutual information score (*Gfap*, *Trp53i11*, *Wipf3*), shown for each region on the Allen atlas section. For calculating these estimates we solve the variational algorithm with LDDMM and quadratic programming estimation of the gene feature distributions to map the Allen atlas section,  $Z = 485$  to the Allen MERFISH target image-varifold. For this result, the smaller feature space of 20 total gene types corresponding to those with the highest mutual information scores are used for the mapping algorithm.

## 2.4 Mapping of Cell Distributions to Atlases

The two previous sections presented results solving the mapping problem between atlas and MERFISH based on the mRNA reads directly. Alternatively, these raw mRNA reads can be segmented into discrete cells as a mode of data reduction followed by downstream analyses clustering the cells into discrete cell types. The mesh-based image varifold framework is ideal for taking the measure representation directly on the aggregated cells and solving the variational problem of mapping to atlas coordinates. Figure 4 shows the results of mapping an Allen atlas section at  $Z = 675$  to a section of cell-segmented MERFISH transcriptional data (courtesy of the JEFworks Lab, Johns Hopkins University). The total gene set measured is  $\approx 500$  genes, with each transcript assigned to a single cell. Transcriptional profiles per cell are clustered into 33 distinct clusters using Leiden graph-based clustering [38] and annotated as cell types based on known marker genes. This gives a cell-based dataset analogous to the transcript-based dataset discussed in Section 2.2 in which densities,  $\alpha_j(\cdot)$ , reflect the spatial density of data points (here,  $\frac{\# \text{ cells}}{\text{mm}^2}$ ), and conditional probability distributions,  $\zeta_j(\cdot)$ , are defined over the feature space of cell types,  $|\mathcal{F}| = 33$ .

The essential part of the model for estimating the atlas distribution over cell types is the stationarity of the model across each atlas partition. It is therefore natural to examine the entropy of the distribution within each atlas compartment as a measure of the multiplicity of cell types within a compartment. Shown in the right column is the entropy of the estimated probability distribution over cell types for each simplex in both target and atlas, with nonzero probabilities assigned to  $\sim 3 - 5$  distinct cell types in each simplex of the target versus  $\sim 1 - 20$  cell types in each simplex of the atlas, varying per region in the original ontology.

553  
554  
555  
556  
557  
558  
559  
560  
561  
562  
563  
564  
565  
566  
567  
568  
569  
570  
571  
572  
573  
574  
575  
576  
577  
578  
579  
580  
581  
582  
583  
584  
585  
586  
587  
588  
589  
590  
591  
592  
593  
594  
595  
596  
597  
598

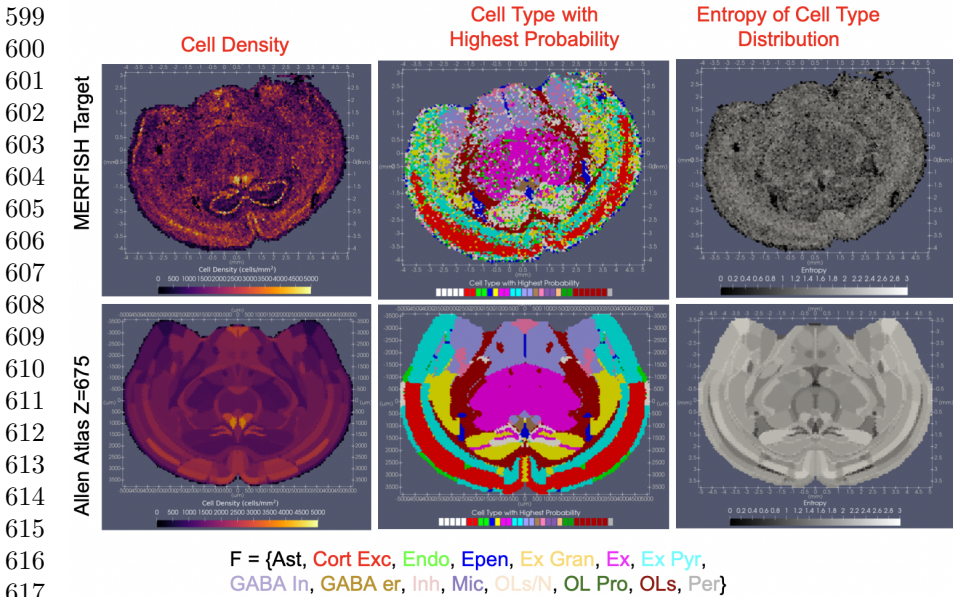

618 **Fig. 4** Cell densities and cell-type probabilities for MERFISH sections (top row). Estimated cell densities and cell type probabilities,  $\alpha_j^\pi, \zeta_j^\pi, j \in J_0$  in Allen atlas section  $Z = 675$   
619 (bottom). Spatial density of cells given in units of  $\frac{\# \text{ cells}}{|\gamma_j|}$  (left) and cell type probabilities  
620 summarized by depiction of cell type with highest probability for each simplex (middle),  
621 and entropy of probability distribution over cell types for each simplex (right). Specific sub-  
622 types of cell types (e.g. astrocytes type 1, astrocytes type 2, assigned same color according  
623 to labels shown in bottom of figure). Abbreviations of cell types: Astrocytes (Ast), Cortical  
624 Excitatory Neurons (Cort Exc), Endothelial Cells (Endo), Ependymal Cells (Epen), Excitatory  
625 Granule Cells (Ex Gran), Excitatory Neurons (Ex), Excitatory Pyramidal Neurons  
626 (Ex Pyr), GABAergic inhibitory neurons (GABA In), GABAergic Estrogen Receptor Neu-  
627 rons (GABA er), Inhibitory Neurons (Inh), Microglia (Mic), Oligodendrocytes / Neurons  
628 (OLs/N), Oligodendrocyte Progenitor Cells (OL Pro), Oligodendrocytes (OLs), Pericytes  
629 (Per).

630  
631 We emphasize that there are various methods for solving the segmentation  
632 to cells and thereby dimension reduction as determined by the specific imag-  
633 ing technology. Some of the methods are rooted in image-based segmentation  
634 schemes such as the Watershed algorithm, operating jointly on transcriptional  
635 data and immunofluorescence images such as DAPI stains [39], while others  
636 utilize learning-based methods [40] for accommodating often a wider diver-  
637 sity of cell shapes and sizes. In either case, the assignment of mRNA reads to  
638 specific cells introduces a layer of functional information at the micron scale,  
639 which can now be modeled in lieu of or in tandem with the functional infor-  
640 mation at the nanometer scale (e.g. raw mRNA reads) as the feature space  
641 of a target image varifold to which we wish to map sections of an atlas. The  
642 image-varifold method is universal in the sense that it is agnostic to which dis-  
643 crete object is forming the information that provides the substrate for building  
644 correspondence.

In addition to cell type as the features associated to the cell aggregated transcriptome data, the feature space can remain gene type generated by aggregating the individual mRNA transcripts into an average gene expression feature per cell across the span of tissue. Shown in Figure 5 are the distribution of two genes (*Ntrk3*, *Fzd3*) out of a subset of 7 chosen to have the highest mutual information score. By normalizing the total mRNA per cell to 1, we estimate for an atlas section, a density,  $\alpha^\pi$  in units of  $\frac{\# \text{ cells}}{\text{mm}^2}$ , and a conditional distribution over gene types,  $\zeta^\pi$ , reflecting the probability per cell in the given simplex, of mRNA belonging to each gene type. Figure 5 shows these estimated probabilities  $\zeta^\pi$  for those genes whose probability of expression per cell is correspondingly shown in the MERFISH target section.

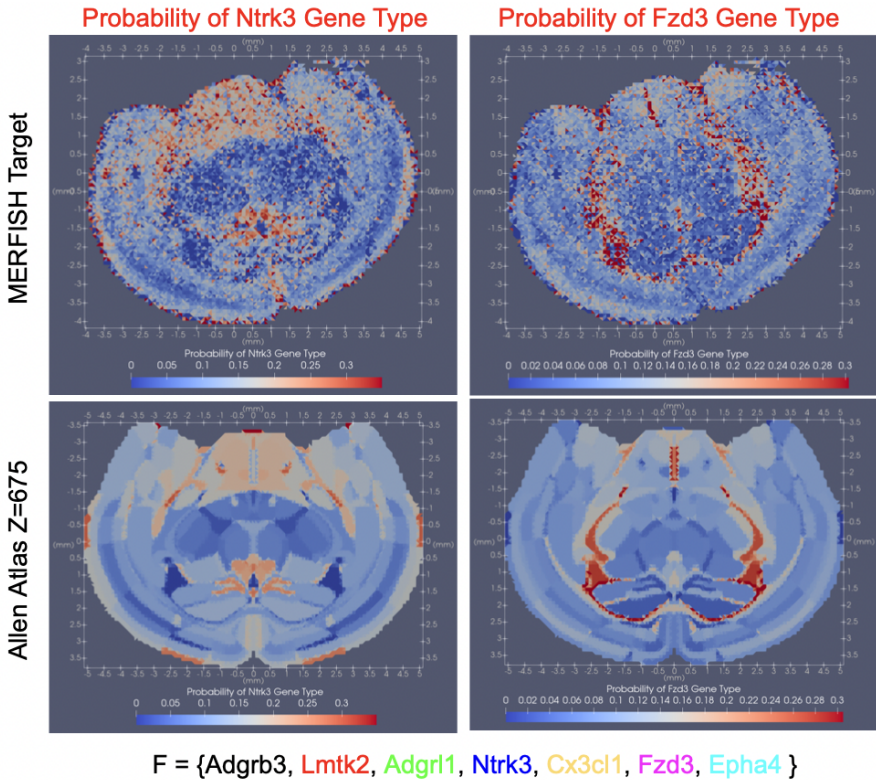

**Fig. 5** Gene type probabilities per cell for MERFISH section (top) for two genes *Ntrk3* gene type (left) and *Fzd3* gene type (right) out of a selected subset of 7 genes with high spatial discriminance according to mutual information score (see Section 4.4). Bottom shows estimated probabilities,  $\zeta^\pi$ , for corresponding coronal Allen slice  $Z = 675$ .



## 691 2.5 Stability of Geometric Transformations Across 692 Varying Feature Spaces 693

694 The previous section demonstrated the efficacy and flexibility of our algorithm  
695 at mapping cartoon atlases to a molecular target in the settings of that target  
696 carrying either gene-based or cell-based functional information. The assumed  
697 biological correlation between cell type and pattern of gene expression implies  
698 that signals of variation across cell types at the scale of microns should also  
699 exist across gene types at the scale of nanometers. Consequently, we might  
700 expect similar spatial deformation of a tissue scale atlas in mapping onto the  
701 same geometric target, but with conditional feature distributions defined over  
702 either gene or cell types, with partition boundaries deforming to match regions  
703 of homogeneity that would be roughly consistent across genes and cells.

704 Figure 6 shows the diffeomorphisms estimated for mapping Allen atlas  
705 sections at  $Z = 890$  and  $Z = 675$  onto two MERFISH target sections carry-  
706 ing three different feature spaces constructed from the same starting spatial  
707 transcriptomics data. Comparing left to middle and right columns, we see simi-  
708 lar geometric transformations,  $\varphi$ , estimated to bring atlas onto target image  
709 varifold carrying cell type (left) versus gene type (middle, right) functional fea-  
710 tures. Regions of shrinkage (blue) versus expansion (red) occur in consistent  
711 areas across the different cases, and the magnitude of that change, as measured  
712 by the determinant jacobian,  $|D\varphi|$ , is also similar in each case. Furthermore,  
713 we illustrate the effect of using two different subsets of 7 spatially discrimi-  
714 nating gene types as the feature space. The first carries a high score based  
715 on Moran's I (middle) and the second with a high mutual information score  
716 (right), as described in Sections 2.3 and 4.4. Here again, we observe similarity in  
717 the geometric mappings estimated for carrying atlas onto target between these  
718 two independent feature spaces. Hence, the manifest stability in the geometric  
719 mappings jointly estimated with the feature laws,  $(\pi_\ell)_{\ell \in \mathcal{L}}$ , over three different  
720 feature spaces supports the stability of our alternating algorithm in the face  
721 of different numbers and types of features, but also speaks to the stability of  
722 the biological organization across tissue, cellular, and molecular scales.

723  
724  
725  
726  
727  
728  
729  
730  
731  
732  
733  
734  
735  
736

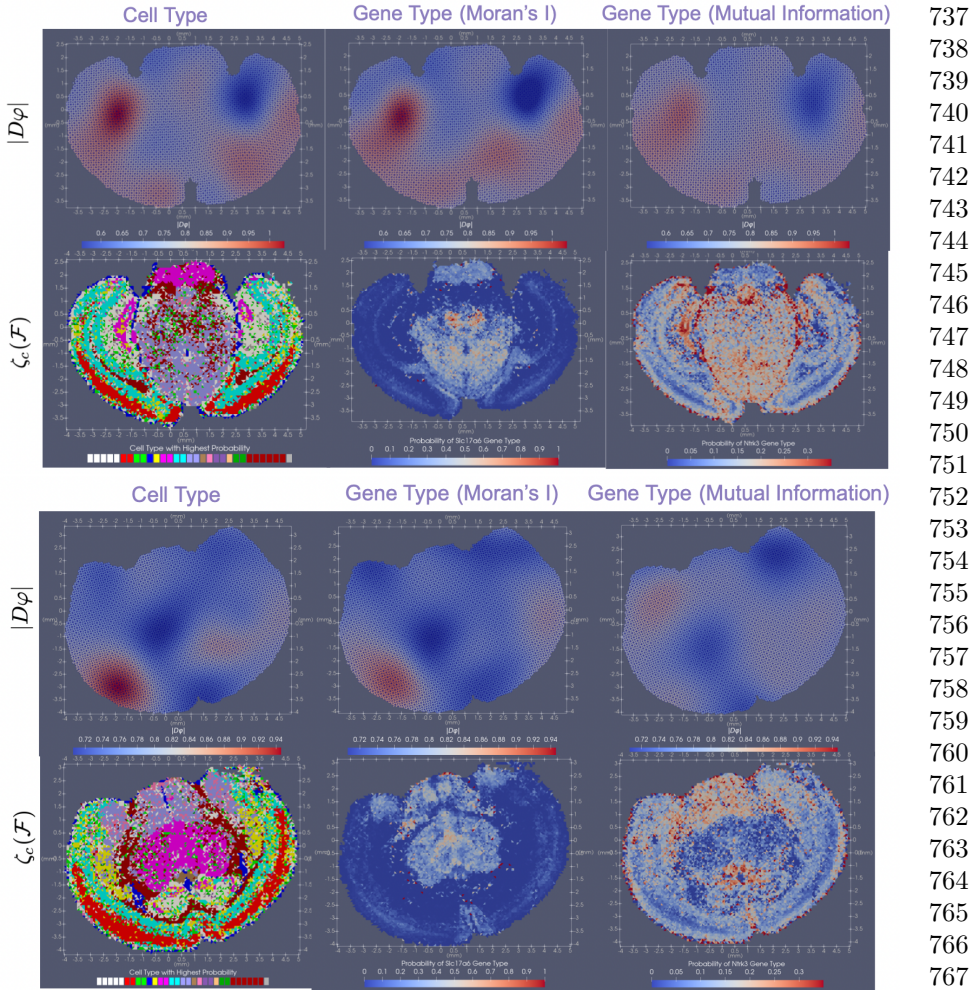

**Fig. 6** Diffeomorphism mappings of Allen atlas sections  $Z = 890$  (top) and  $Z = 675$  (bottom) to corresponding MERFISH sections for different feature spaces (e.g. cell types or gene types for a chosen subset of 7 genes). Top rows show the determinant of the Jacobian of the mapping  $|D\varphi_1|$  displaying areas of expansion (red) and contraction (blue). Bottom rows display different features on MERFISH sections including cell type (left), gene type in 7-gene subset selected with Moran's I (middle), and gene type in 7-gene subset selected with Mutual Information (right). Cell types plotted as that with maximum probability; gene types plotted as probabilities for one specific gene in each subset.

## 2.6 Generalizing the Methodology to Compare Atlas to Atlas

The variational problem we solve via quadratic programming and LDDMM mapping between coordinates in (5) is universal in the sense that varifold representations can not only be used to represent the MERFISH sections of

783 cellular and molecular data, as described in sections 2.3 and 2.4, but as well  
 784 can be used to represent atlases, themselves. This allows us to map multiple  
 785 atlas ontologies, one to another.

786 This is important because widespread variations in brain atlas ontologies  
 787 have been developed to represent the molecular, chemical, genetic, and electro-  
 788 physiological signals being measured across institutions. With different levels  
 789 of granularity and different intended applications, multiple atlases per species  
 790 now exist and are continuing to emerge [1, 2, 41, 42, 43, 44]. While some  
 791 atlases have been defined in the same coordinate framework—often achieved  
 792 through existing methods of image registration or manual alignment [28]—  
 793 many exist in different coordinate frameworks. Together with mismatches in  
 794 number, type, and positioning of partitions, this poses a challenge not only to  
 795 the evaluation of each atlas ontology’s fit to a molecular target, but also the  
 796 ready comparison of atlas to atlas and the establishment of a clear metric of  
 797 similarity between them.

798 Figure 7 shows the results of mapping corresponding sections of both the  
 799 ARA and Kim Lab Developmental atlas [43] to the cell-segmented MERFISH  
 800 section of Figure 4. The images of predicted cell types with the highest prob-  
 801 ability (left column) for each compartment are shown for each ontology in  
 802 the left column. The areas of the hippocampus (dashed circle) and striatum  
 803 and amygdala (arrow) are partitioned with different levels of granularity. This  
 804 leads to different optimal geometric transformations, as characterized by the  
 805 determinant Jacobian (middle column), and different predicted cell type dis-  
 806 tributions (right column). Though both atlases are published as geometrically  
 807 aligned [43], the diffeomorphism solving the variational problem transforms  
 808 geometrically the homogenous regions between the atlas and target. Hence,  
 809 regions of the amygdala and striatum undergo significant contraction in the  
 810 optimal mapping of Kim but not Allen atlas to MERFISH given the parti-  
 811 tioning of this region into fewer and thus larger presumed homogenous regions  
 812 in the Kim atlas. The right column exhibits the entropy of the distributions  
 813 over cell types estimated for each region in each atlas. Here, the hippocam-  
 814 pus is more finely partitioned in the Kim atlas, which yields lower entropy  
 815 distributions over cell types than in those estimated for the Allen atlas.

816 The universality of the variational problem allows for direct mapping  
 817 across atlas ontologies. Here, atlases are taken to have constant density,  
 818  $\alpha^{\min} = \alpha^{\max} = 1$ . Thus, the mapping problem from atlas with ontology  $\mathcal{L}^0$   
 819 onto the target with ontology  $\mathcal{L}^1$  optimizes over the feature laws,  $(\pi_\ell)_{\ell \in \mathcal{L}^0}$ ,  
 820 with the target atlas ontology  $\mathcal{L}^1$  taken as the target feature space,

$$821 \quad 822 \quad 823 \quad 824 \quad \sum_{f \in \mathcal{L}^1} \pi_\ell(f) = 1, \ell \in \mathcal{L}^0 .$$

825 The joint estimation of geometric transformation,  $\varphi$  and conditional feature  
 826 laws,  $(\pi_\ell)_{\ell \in \mathcal{L}}$  in our mapping methodology offers two modes of quantitative  
 827 comparison of these atlas ontologies. First, as in classical image setting of  
 828 LDDMM, the determinant jacobian,  $|D\varphi|$ , of the estimated diffeomorphism,



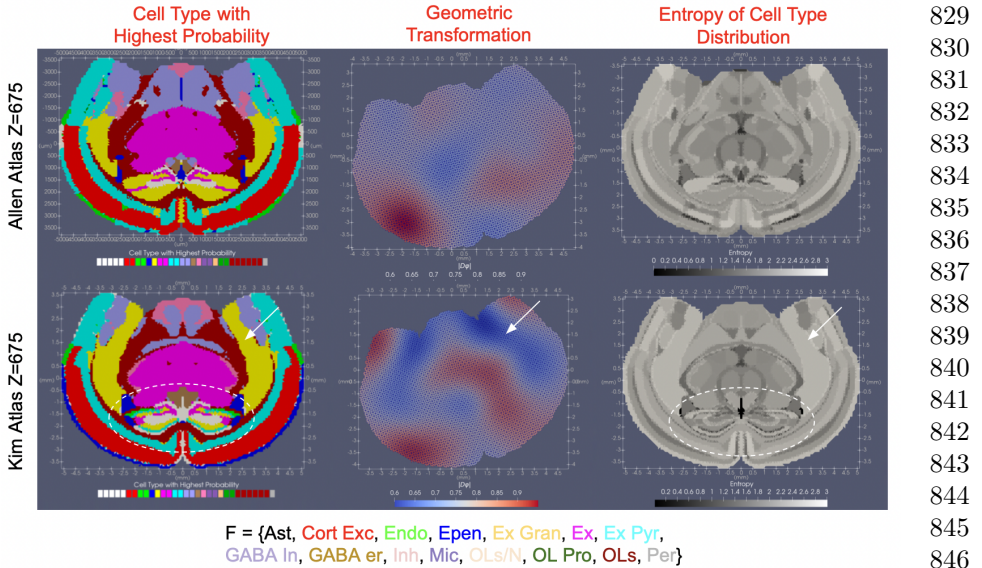

**Fig. 7** Comparison of mappings of Z section 675 of ARA (top) and Kim atlas (bottom) to cell-segmented MERFISH section. Left shows cell type with highest probability per simplex in each atlas. Middle shows estimated geometric transformation,  $\varphi_1$ , in each setting applied to each atlas, with areas of expansion (red) and contraction (blue) as measured by the determinant Jacobian,  $|D\varphi_1|$ , of each mapping. Right shows entropy of estimated cell type distribution per simplex in atlas. Circled area of hippocampus and arrow pointing to area of amygdala and striatum highlight differences in estimated mappings for each atlas.

can be used as metric of how similar the atlas ontologies are, reflective of how much boundaries of partitions move to maximize overlap between homogenous regions. However, unlike in classical image settings, the estimation of the additional family of feature laws here affords a second metric of similarity with computation of the entropy of the estimated conditional feature distributions.

Figure 8 shows the results of mapping one mouse atlas ontology to another with the Z section 680 in the ARA mapped to the corresponding section in the Kim Lab Developmental atlas (top row) and vice versa (bottom row). The leftmost column depicts the geometry of the section under each ontology, with the Allen section hosting  $\approx 140$  independent regions and the Kim section  $\approx 80$ . In this setting, both atlases are published in the same coordinate framework, giving  $\varphi = Id$  and thus, highlighting, instead, the estimated distributions over the other ontologies. The middle column depicts the estimated conditional probability distributions,  $\zeta^\pi$ , for each atlas section over the other atlas section's ontology. The label with the highest probability in these distributions is plotted for each simplex in the mesh and which is consistent across each partition of each original atlas, given the homogeneity assumption in our model (i.e. a single  $\pi_\ell$  for each  $\ell \in \mathcal{L}^0$ ). The comparatively larger set of labels in the Allen ontology results in labels being omitted from the corresponding estimated set of labels on the Kim ontology section (middle column, bottom row) while multiple

875 regions in the Allen ontology carry the same most probable region in the Kim  
 876 ontology. The right column of Figure 8 captures this difference in depicting the  
 877 entropy of the estimated conditional feature distributions,  $(\zeta_j^\pi)_{j \in \mathcal{J}_0}$ , for each  
 878 simplex of the mesh. The entropy of the distributions estimated for the Kim  
 879 ontology over the Allen ontology (bottom) is on average, higher, than that of  
 880 the distributions estimated for the Allen ontology (top), with probability mass  
 881 distributed across  $\sim 5 - 7$  different Allen regions for each Kim region of cortex.  
 882 Nevertheless, we see close to 1:1 correspondence between Allen and Kim labels  
 883 in the center section of the slice, where entropy of the estimated distributions  
 884 is near 0.

885

886

887

888

889

890

891

892

893

894

895

896

897

898

899

900

901

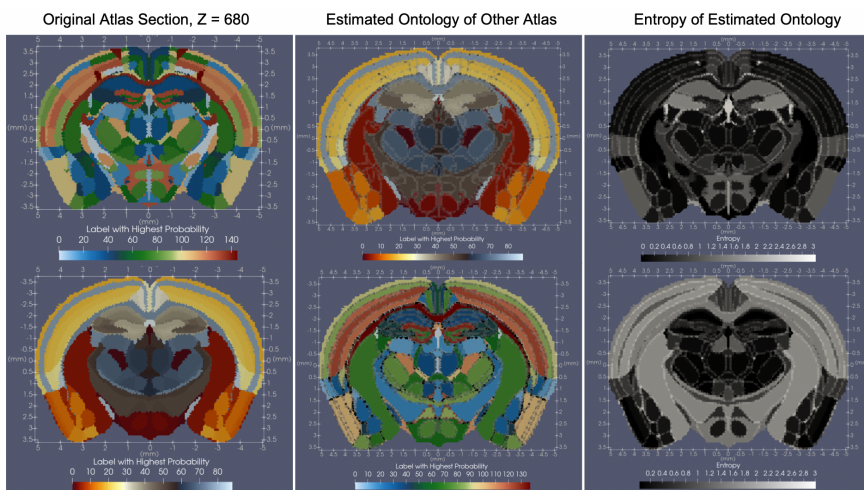

902 **Fig. 8** Original and predicted ontologies for Allen (top) and Kim (bottom) atlases. Left  
 903 column illustrates original ontologies. Middle column illustrates Allen atlas geometry with  
 904 Kim atlas ontology (top) and Kim atlas geometry with Allen atlas ontology (bottom). Right  
 905 column shows entropy of predicted ontologies, with higher entropy values (light) indicating  
 906 less 1:1 correspondence between ontologies.

906

907

908 Atlas ontologies can be mapped not just within species but also across  
 909 them, where both geometric transformations and estimated ontology distribu-  
 910 tions, together reflect metrics of comparison between the two. Figure 9 shows  
 911 the mapping of coronal section,  $Z = 537$ , in the ARA to a coronal section,  
 912  $Z = 628$  in the Waxholm Rat Brain Atlas [44], with both sections chosen  
 913 to correspond as sections through the anterior commissure. The left column  
 914 shows both atlas ontologies with  $|\mathcal{L}^0| \approx 120$  for the the Allen atlas section and  
 915  $|\mathcal{L}^1| \approx 30$  for the Waxholm atlas section. The middle column depicts the initial  
 916 differences in size and shape (top) between the two tissue sections. After  
 917 scaling the volume of the mouse brain by 1.5, additional deformation, with  
 918 magnitude given by the determinant jacobian,  $|D\varphi|$ , distorts both internal and  
 919 external tissue boundaries to align homogeneous regions in each atlas, such as  
 920 cingulate area to cingulate area (white arrow). Estimated distributions over

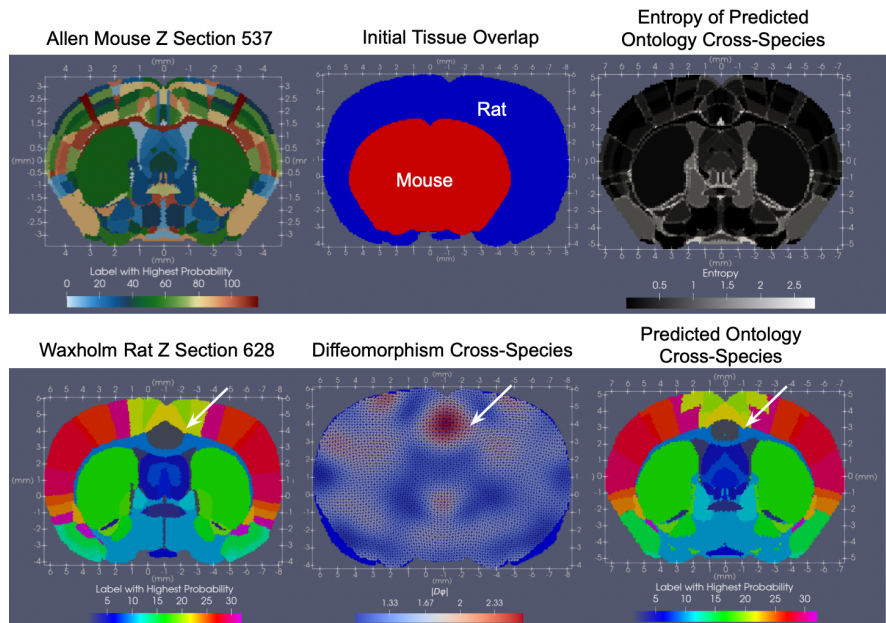

**Fig. 9** Results of mapping coronal section  $Z = 537$  of ARA to corresponding coronal section of Waxholm Rat Brain Atlas at  $Z = 628$ , both chosen to be through the anterior commissure. Left shows both original atlas sections. Middle column shows initial tissue overlap between mouse and rat section (top) and resulting overlap following action of estimated diffeomorphism on mouse tissue (bottom). Determinant of Jacobian highlights areas of expansion (red) and contraction (blue) in mouse section deforming to match rat section, with white arrow highlighting expansion in cingulate area needed to match region in mouse to corresponding region in rat. Right column shows entropy for each mouse region’s predicted distribution of rat labels (top) and predicted rat label with highest probability (bottom).

the Waxholm ontology labels for each region in the Allen atlas are shown in the right column, summarized by the maximum probability label (bottom) and measures of entropy (top), which highlight in gray, Allen regions mapping to  $\approx 3 - 4$  Waxholm regions versus those in black achieving 1:1 correspondence.

### 3 Discussion

We have introduced, here, a universal method for mapping tissue scale, ‘cartoon’ atlases to molecular and cellular datasets arising in the context of emerging transcriptomics technologies. We root our method in the modeling of each object as a mesh-based image varifold, as previously described [27], and outline an alternating algorithm that simultaneously incorporates the classical deformation tools of LDDMM [29] with quadratic programming to jointly estimate an optimal geometric transformation and conditional feature law that maps atlas onto target.

967 As presented, our method fills a current need, as highlighted previously  
968 [35], for universal tools that can integrate the diverse types and large quanti-  
969 ties of data emerging from the evolution of both transcriptomics and imaging  
970 technologies over the last decade. With each technology generating a slightly  
971 different perspective and different set of animal or human samples to com-  
972 pare, a method that can stably handle the format of past, current, and future  
973 datasets will be paramount to integrate both new findings with the vast  
974 number of datastores currently available across institutes. The image varifold  
975 framework used here is general enough to model emerging transcriptional data  
976 from both image-based and spot-resolution technologies and classical imaging  
977 data (as demonstrated in our atlas-to-atlas mappings). Therefore, it provides  
978 a gateway for comparing data historically curated through immunohistochem-  
979 istry, MRI, and other techniques in addition to the emerging transcriptomics  
980 methods.

981 In parallel to the development and dispersion of diverse molecular datasets,  
982 there has been continued development on the side of reference atlases to reflect  
983 trends in these new measures and integrate these trends across even more  
984 samples of particular species. Our method offers a tool for re-examining and  
985 comparing existing atlas ontologies in the context of new data [35], and serves  
986 as a means for developing new atlases in the future. As described in Section 2.6,  
987 examination of the mappings achieved between different atlases and the same  
988 molecular target offers an indirect comparison between atlases in the context  
989 of a particular molecular setting. However, this comparison can also be made  
990 directly in a context-independent setting by harnessing our method to map  
991 atlas to atlas. In the field of evolutionary biology, for instance, our method  
992 could aid in the mapping and comparison of atlases across species [45, 46] and  
993 in the field of developmental neurobiology, the available atlases of the brain at  
994 different stages of development [42, 41]. With regard to atlas refinement and  
995 creation, the invertibility of the estimated diffeomorphism in the setting of  
996 mapping atlas to molecular target, enables the carrying of each target into the  
997 same coordinate space of the atlas. Here, the molecular and cellular scale raw  
998 reads could be averaged across individual samples, thus providing a mode for  
999 defining new atlas segmentation schemes of homogenous regions across these  
1000 samples.

1001 While the results presented here survey a wide variety of potential appli-  
1002 cations of our method to mapping atlas modalities to diverse targets, there  
1003 remain uncertainties and potential modes of improvement that are the sub-  
1004 ject of current and future work. First, we have presented results mapping 2D  
1005 sections of 3D atlases to corresponding 2D sections of MERFISH data. The  
1006 Allen MERFISH data showcased here is part of an entire set of serial sections  
1007 that span the whole brain. Consequently, we are optimizing our method to com-  
1008 pute mappings of atlas to molecular target in 3D, where both added dimensions  
1009 and added magnitudes of data contribute to the theoretical and computational  
1010 complexity of the problem. Indeed, with  $\approx 6$  billion individual transcripts mea-  
1011 sured across the span of the brain, treatment of this data as a regular lattice  
1012



image would require on the order of 1000 billion voxels at 1  $\mu\text{m}$  resolution, which is coarser than that needed even to resolve two molecules of mRNA. Hence, it becomes even more vital to treat such data in the particle setting, as presented here, where we capture the sparsity and irregularity of the data in modeling it effectively in its lowest dimension, as 6 billion individual particle measures. Second, though we have highlighted both gene-based and cell-based datasets achieved with image-based MERFISH technologies, we are currently investigating the use of our method to map data from spot-resolution technologies such as SlideSeq [47] and additional image-based technologies such as BarSeq [48], which introduce variations in both the number of genes measured and the scope of tissue (whole versus hemi-brain) measured.

Finally, we emphasize that central to the model posed here is the underlying assumption that each compartment has a homogeneous distribution over molecular features that is stationary with respect to space. This assumption holds in many settings, as we might expect, given the inherent construction of atlases often to delineate regions of particular cell types and thus, where we see a set of predominant cell types or gene types consistently across the region in the molecular scale data, as in Figures 4 and 5. However, we also see examples where this homogeneity assumption may not be appropriate. An example of this is seen in Figure 3 where the expression of *Trp53i11* appears to be distributed along a decreasing gradient medial to lateral within the striatum. Notably, the results presented here reflect a particular balance between expected deformation and this homogeneity assumption, imposed by the relative weighting of the separate terms in the cost function. Current work at controlling this balance further includes the addition of a term controlling the divergence of the vector field to the energy defined in the variational problem 5, which leads to solutions more robust to deformation within the interior of the tissue. Future work will also include more rigorous evaluation of how well this homogeneity assumption holds and the effect the given balance between the two terms might have in different settings.

## 4 Methods

### 4.1 Construction of Mesh-based Image Varifold for Different Modalities

As introduced in Section 2.2, we represent each image varifold object as a triangulated mesh. Each mesh is built from a collection of vertices,  $\mathbf{x} = (x_i)_{i \in I}$  with each  $x_i \in \mathbb{R}^2$ , here. Each simplex in the mesh is defined from the vertices denoted as  $\gamma(\mathbf{x})$  and is paired with a 3-tuple with components that index the vertices of the simplex,  $(\gamma(\mathbf{x}), c = (c^1, c^2, c^3) \in I^3)$  and determine the center  $m(\mathbf{x}) = \frac{1}{3}(x_{c^1} + x_{c^2} + x_{c^3})$ . Each triangle simplex is defined by

$$\gamma(\mathbf{x}) = \left\{ y \in \mathbb{R}^2 : y = \sum_{k=1}^3 a_k x_{c^k}, a_k \geq 0, \sum_{k=1}^3 a_k = 1 \right\}, \quad (6)$$

1059 with positive orientation and volume  $|\gamma_c(\mathbf{x})| := \frac{1}{2}(x_{c^2} - x_{c^1}) \times (x_{c^3} - x_{c^1}) > 0$ .  
 1060 The total mesh  $\tau$  is the collection of vertices  $\mathbf{x}$ , and simplices and centers  
 1061  $(\gamma_j(\mathbf{x}), c_j = (c_j^1, c_j^2, c_j^3), m_j(\mathbf{x}))_{j \in J}$  with the resolution determining the com-  
 1062 plexity as total numbers of vertices  $|I|$  and the number of simplices  $|J|$  in the  
 1063 mesh.

1064 Meshes were constructed using Delauney triangulation [49] on a grid  
 1065 defined over the support of the starting dataset with the size of each square  
 1066 dictated by the input resolution. Varifold measures,  $\alpha, \zeta$ , were associated to  
 1067 the simplices of the mesh following assignment of each individual data point  
 1068 (e.g. mRNA or cell read) into its single nearest simplex. Meshes were pruned of  
 1069 simplices that both contained fewer than 1 data point and existed outside the  
 1070 largest connected component of simplices containing at least one data point.  
 1071 In this manner, both for atlas images and transcriptomics data sets, resulting  
 1072 simplex meshes spanned the entire tissue foreground.

1073

## 1074 4.2 Molecular Scale Varifold Norm

1075

1076 To specify the image varifold norm for  $\mu \in W^*$ ,  $\|\cdot\|_{W^*}^2$ , it suffices to provide  
 1077 the inner product between Diracs  $\langle \delta_x \otimes \delta_f, \delta_{x'} \otimes \delta_{f'} \rangle_{W^*} = K((x, f), (x', f'))$ ,  
 1078 the right-hand side the kernel with for any weighted sum  $\mu$  in Eqn. (1) then

1079

$$1080 \|\mu\|_{W^*}^2 = \sum_{i,j} w_i w_j K((x_i, f_i), (x_j, f_j)). \quad (7)$$

1081

1082

1083 Throughout we use the kernel product  $K((x, f), (x', f')) =$   
 1084  $K_1(x, x')K_2(f, f')$  chosen as a Gaussian over physical space  $K_1(x, y) =$   
 1085  $\exp(-\frac{\|x-x'\|^2}{2\sigma^2})$  with  $K_2(f, f') = 1$  if  $f = f'$ , 0 otherwise giving:

1086

$$1087 \|\mu_\tau\|_{W^*}^2 = \sum_{j,k \in J} K_1(m_j, m_k) \sum_{f \in \mathcal{F}} \zeta_j(f) \zeta_k(f). \quad (8)$$

1088

1089

## 1090 4.3 Alternating LDDMM and Quadratic Program 1091 Algorithm for Joint Optimization

1092

1093 For solving the variational problem of (5) we follow [27] using an alternat-  
 1094 ing optimization, fixing the laws  $(\pi_\ell)_{\ell \in \mathcal{L}}$  and optimizing over the control  
 1095  $v(t), t \in [0, 1]$  and integrating it to generate the diffeomorphism  $\varphi_1$ , then fix-  
 1096 ing the diffeomorphism and using quadratic programming to estimate the laws.  
 1097 The variational problem of (5) is optimized using LDDMM by flowing the  
 1098 atlas  $\varphi_t \cdot \mu_{\tau_0}^\pi$  to minimize the target norm to the endpoint  $\mu_\tau$ . Smoothness is  
 1099 enforced via the reproducing kernel Hilbert space norm on the control  $\|\cdot\|_V$   
 1100 which controls the differentiability of the flow of vector fields, which is suffi-  
 1101 cient to guarantee an invertible diffeomorphic result [50]. Holding that fixed  
 1102 we alternately optimize (5) with respect to the laws  $(\pi_\ell)_{\ell \in \mathcal{L}}$  using quadratic  
 1103 programming, such as OSQP [51]. We loop until convergence.

1104

**Algorithm 1****Initialize:**  $\pi_\ell(f) = \frac{1}{|\mathcal{F}|}, f \in \mathcal{F}$ **A: Solve for  $v$ :**

1. Update and fix  $(\pi_\ell(f))_{f \in \mathcal{F}}$ .
2. Solve LDDMM, optimizing (5) with respect to vector field  $v_t, t \in [0, 1]$ .
3. Solve for  $\varphi_1$ , integrating O.D.E  $\varphi_1 = \int_0^1 v_t \circ \varphi_t dt + Id$ .
4. Flow  $\mu_{\tau_0}^\pi$  according to  $\varphi_1$ , giving  $\varphi_1 \cdot \mu_{\tau_0}^\pi$ .

**B: Solve for  $(\pi_\ell)_{\ell \in \mathcal{L}}$ :**

1. Fix vertex positions in deformed template,  $\varphi(\mathbf{x}^0)$ .
2. Optimize quadratic program (9) with respect to  $(\pi_\ell)_{\ell \in \mathcal{L}}$ .

**Return to A**

For the atlas, take the mesh  $\tau_0$  with vertices  $\mathbf{x}^0 = (x_i)_{i \in I_0}$  and with simplices and centers  $(\gamma_j(\mathbf{x}^0), c_j = (c_j^1, c_j^2, c_j^3)), m_j(\mathbf{x}^0)_{j \in J_0}$ . Estimated densities and conditional probabilities are denoted  $(\alpha_j^\pi, \zeta_j^\pi)_{j \in J_0}$ . Define  $m_j(\varphi_1(\mathbf{x}^0)) = m_j^\varphi, \bar{\pi}_j = \sum_{\ell \in \mathcal{L}} p_j(\ell) \pi_\ell$ , giving  $\alpha_j^\pi = \bar{\pi}_j(\mathcal{F})$ . The quadratic program is given by:

$$\begin{aligned}
 & \inf_{\pi_\ell, \ell \in \mathcal{L}} \|\varphi_1 \cdot \mu_{\tau_0}^\pi - \mu_\tau\|_{W^*}^2 & (9) \\
 & = \inf_{\pi_\ell, \ell \in \mathcal{L}} \sum_{j, j' \in J_0^2} |D\varphi_1|_{m_j} |\gamma_j| |D\varphi_1|_{m_{j'}} |\gamma_{j'}| K_1(m_j^\varphi, m_{j'}^\varphi) \sum_{f \in \mathcal{F}} \bar{\pi}_j(f) \bar{\pi}_{j'}(f) \\
 & - 2 \sum_{j' \in J_0, j \in J} |D\varphi_1|_{m_{j'}} |\gamma_{j'}| |\gamma_j| K_1(m_{j'}^\varphi, m_j) \sum_{f \in \mathcal{F}} \alpha_j \zeta_j(f) \bar{\pi}_{j'}(f) \\
 & \text{subject to } \alpha_j^{\min} \leq \alpha_j^\pi \leq \alpha_j^{\max}, j \in J_0.
 \end{aligned}$$

*Remark 1* In the algorithm, we can use two approximations that are convenient. The first approximates the determinant of the Jacobian. Denoting  $\gamma_j^\varphi = |\gamma_j(\varphi_1(\mathbf{x}^0))|$ , then approximating  $|\gamma_j(\varphi_1(\mathbf{x}^0))| \approx |D\varphi_1|_{m_j(\mathbf{x}^0)} |\gamma_j(\mathbf{x}^0)|$  gives the simplified cost of the quadratic program:

$$\begin{aligned}
 & \inf_{\pi_\ell, \ell \in \mathcal{L}} \sum_{j, j' \in J_0^2} |\gamma_j^\varphi| |\gamma_{j'}^\varphi| K_1(m_j^\varphi, m_{j'}^\varphi) \sum_{f \in \mathcal{F}} \bar{\pi}_j(f) \bar{\pi}_{j'}(f) \\
 & - 2 \sum_{j' \in J_0, j \in J} |\gamma_{j'}^\varphi| |\gamma_j| K_1(m_{j'}^\varphi, m_j) \sum_{f \in \mathcal{F}} \alpha_j \zeta_j(f) \bar{\pi}_{j'}(f).
 \end{aligned}$$

This can be simplified by representing the estimated laws  $\bar{\pi}$  via the labels which have greatest area for the simplex. Defining the greedy maximizer map  $\ell^*(j) = \arg \max_{\ell \in \mathcal{L}} p_j(\ell) \in \mathcal{L}$ , then the inner product can be approximated by

$$\begin{aligned}
 \sum_{f \in \mathcal{F}} \bar{\pi}_j(f) \bar{\pi}_{j'}(f) &= \sum_{f \in \mathcal{F}} \pi_{\ell^*(j)}(f) \pi_{\ell^*(j')}(f); \\
 \sum_{f \in \mathcal{F}} \alpha_j \zeta_j(f) \bar{\pi}_{j'}(f) &= \sum_{f \in \mathcal{F}} \alpha_j \zeta_j(f) \pi_{\ell^*(j')}(f).
 \end{aligned}$$



1151 For simplex triangles within the interior of each atlas region, denoted  $j \in J_0 \setminus \partial J_0$ ,  
 1152 then  $\bar{\pi}_j = \pi_{\ell^*(j)}$ ,  $j \in J_0 \setminus \partial J_0$  and these approximations are an equality for all interior  
 1153 pairs of vertices.

1154

1155 For all results shown, the template and target are initially aligned through  
 1156 separate estimation of rigid transformations (translation and rotation) and a  
 1157 single isotropic scaling applied to the template to bring the total area of the  
 1158 template to equal that of the target. Rigid transformations are estimated by  
 1159 minimizing the varifold normed difference Eqn. (9) between the rotated and  
 1160 translated template atlas  $\mu_{\tau_0}^\pi$  transformed to the target  $\mu_\tau$ .

1161 Everything being specified, gradient based optimization is performed until  
 1162 convergence or a specified number of iterations. In LDDMM, we use L-BFGS  
 1163 optimization combined with a line search using the Wolfe condition. In rigid  
 1164 registration, we directly optimize the varifold norm of the difference, also using  
 1165 the L-BFGS method.

1166

#### 1167 4.4 Mutual Information Score for Discriminating 1168 Spatially Informative Genes 1169

1170 To deduce which genes are spatially variant with respect to their expression  
 1171 patterns, we assign to each gene a score based on mutual information. This  
 1172 score specifically measures the mutual information between a random variable,  
 1173  $M^g$ , that reflects the number of counts of gene  $g$  in a given neighborhood,  
 1174 and a random variable,  $X$ , that partitions this neighborhood vertically or  
 1175 horizontally into two domains. We describe, here, a method for computing this  
 1176 score particularly in settings of large amounts of data, where discretization is  
 1177 favorable for computational efficiency. This method, as illustrated in Figure  
 1178 10, is applied for each gene independently on each measured section of tissue,  
 1179 where collective scores per gene be be garnered by tallying each gene's score  
 1180 per section across the entire set of sections.

1181 The support of the tissue section is first covered by a grid, as shown in  
 1182 the left panel of Figure 10, with squares of size  $\sigma \times \sigma$ . In the results shown  
 1183 in Sections 2.3 and 2.4, we choose  $\sigma = 50\mu\text{m}$ . In each square, we compute  
 1184 the total number of mRNA expressed per each gene in that square, denoted  
 1185 by  $N^g$  for gene  $g$ . Let  $F^g(t) = P(N^g \leq t)$  be the cumulative distribution  
 1186 function for gene  $g$ , estimated from the empirical distribution of  $N^g$  across all  
 1187 squares in our grid. We define the binning function  $\phi^g(n) = \sum_{k=1}^q \mathbf{1}_{n \geq t_k}$  for  
 1188  $t_k = \inf\{t \geq 0 | F^g(t) \geq k/q\}$  and with  $k \in [1, q]$  denoting the  $k$ -th  $q$ -quantile.  
 1189 This gives a discrete (normalized) value of mRNA counts for gene  $g$  in each  
 1190 square of the grid, as shown in the middle panel of Figure 10 for  $g = \text{Gfap}$ .

1191 We define our discrete neighborhoods as megasquares, denoted  $(Q_c)_{c \in \mathcal{C}}$ ,  
 1192 with each comprised of a contiguous set of  $2K \times 2K$  grid squares. We con-  
 1193 sider all possible megasquares that can be defined across the grid, and index  
 1194 the squares within each megasquare by column index  $i = 1 \cdots 2K$  and row  
 1195 index  $j = 1 \cdots 2K$ , giving  $Q_c = \bigcup_{(i,j) \in \{1, \dots, 2K\}^2} Q_{c,i,j}$ . Finally, we define two  
 1196

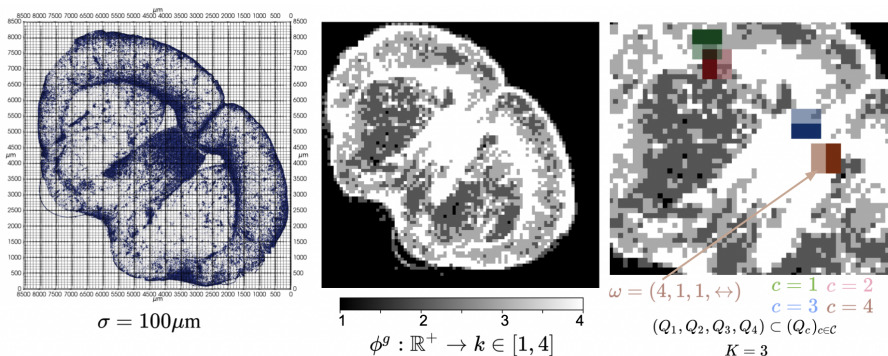

**Fig. 10** Steps in computing mutual information score for each gene in each tissue section. Left shows individual mRNA reads for gene  $g = \text{Gfap}$ . The support of the tissue is covered by a grid with squares of size  $\sigma \times \sigma$ , with  $\sigma = 100\mu\text{m}$  shown here. Middle shows output of binning function,  $\phi^g$  on the counts of gene  $g$  in each grid square, with  $q = 4$ . Right shows zoomed in portion of tissue with sample of 4 megacubes out of the entire set  $(Q_c)_{c \in \mathcal{C}}$ . Example  $\omega$  given for the individual grid square located at the bottom left corner of  $Q_4$ .

partitioning schemes, denoted  $\updownarrow$  and  $\leftrightarrow$ , corresponding to the partitioning of a megasquare into two equal vertical or two equal horizontal domains, each consequently containing  $2K^2$  squares. The right panel of Figure 10 shows a sample of 4 megasquares from the entire set  $(Q_c)_{c \in \mathcal{C}}$  that cover the grid.

The random variables of interest,  $X$  and  $M^g$  are specified as functions of  $\omega = (c, i, j, d) \in \Omega$  with  $\Omega = \mathcal{C} \times [1, 2K]^2 \times \{\updownarrow, \leftrightarrow\}$ , the set of all possible selections of megasquare, square within the megasquare, and partitioning of the megasquare. Specifically, we denote  $C(\omega) = c$ , the index of the megasquare,  $N^g(\omega)$  the counts of gene  $g$  for the square  $Q_{c,i,j}$  in megasquare,  $c$ , giving  $M^g(\omega) = \phi(N^g(\omega)) \in [1, q]$ , the  $q$ -quantile of the gene count, and  $X(\omega) \in \{b, t, l, r\}$ , the partition  $Q_{c,i,j}$  belongs to, dictated by direction  $d$  in  $\omega$  as:

$$X(\omega) = \begin{cases} l & \text{if } d = \leftrightarrow, i \leq K \\ r & \text{if } d = \leftrightarrow, i > K \\ b & \text{if } d = \updownarrow, j \leq K \\ t & \text{if } d = \updownarrow, j > K \end{cases} \quad (10)$$

Choice of  $\omega$  is made uniformly, with  $P = \frac{1}{|\Omega|} \sum_{\omega \in \Omega} \delta_\omega$ . Our score is thus, the conditional mutual information between  $X$  and  $M^g$  given  $C$ :

$$I(X; M^g | C) = \sum_{c,x,m} P(X = x, M^g = m, C = c) \log \left( \frac{P(X = x, M^g = m | C = c)}{P(X = x | C = c)P(M^g = m | C = c)} \right) \quad (11)$$

**Funding.** This work was supported by the National Institutes of Health (1F30AG077736-01 and T32-GM13677 (KS); R01EB020062, R01NS102670,

1243 U19AG033655, P41-EB031771, and R01MH105660 (MM); NIH Brain Initia-  
 1244 tive Grant U19MH114830 (HZ)); the National Science Foundation (NSF)  
 1245 (16-569 NeuroNex contract 1707298 (MM); the Computational Anatomy Sci-  
 1246 ence Gateway (MM) as part of the Extreme Science and Engineering Discovery  
 1247 Environment (XSEDE Towns et al., 2014), which is supported by the NSF  
 1248 grant ACI1548562; NSF CAREER (JF); NSF 2124230 (LY)); and the Kavli  
 1249 Neuroscience Discovery Institute supported by the Kavli Foundation (MM).

1250 **Competing Interests.** Under a license agreement between AnatomyWorks  
 1251 and the Johns Hopkins University, Dr. Miller and the University are entitled  
 1252 to royalty distributions related to technology described in the study discussed  
 1253 in this. Dr. Miller is a founder of and holds equity in AntomyWorks. This  
 1254 arrangement has been reviewed and approved by the Johns Hopkins Univer-  
 1255 sity in accordance with its conflict of interest policies. The remaining authors  
 1256 declare no conflicts of interest.

1257 **Author Contributions.** MM, AT, and LY developed the mathematical  
 1258 theory behind the manuscript. KS and MM drafted the manuscript. KS and  
 1259 LY generated codes for algorithms described in the manuscript. KS created  
 1260 all figures in the manuscript. MK, LN, and HZ generated serial MERFISH  
 1261 data. MA and JF annotated cell types for cell-segmented MERFISH data. YK  
 1262 created the reference atlas analyzed here with the Allen reference atlas. All  
 1263 authors contributed to the editing of the final manuscript.

1264 **Materials and Correspondence.** Questions, comments, and  
 1265 requests should be directed to corresponding authors, Kaitlin Stouffer  
 1266 (kstouff4@jhmi.edu) and Michael Miller (mim@jhu.edu).

1267 **Data Availability.** Serial MERFISH sections from the Allen Insti-  
 1268 tute were produced under the BRAIN Initiative Cell Census Network  
 1269 (BICCN, www.biccn.org, RRID:SCR\_015820) and will be available at the  
 1270 Brain Image Library (BIL, <https://www.brainimagelibrary.org/index.html>)  
 1271 under doi <https://doi.org/10.35077/g.610>. Selected cell-segmented MERFISH  
 1272 sections were provided courtesy of Vizgen and together with cell type  
 1273 annotations are available upon request.

1274 **Code Availability.** Implementations of the algorithms described here can  
 1275 be found at: <https://github.com/kstouff4/MeshLDDMMQP>.

## 1276 1277 1278 1279 1280 **References**

- 1281  
 1282 [1] Wang, Q., Ding, S.-L., Li, Y., Royall, J., Feng, D., Lesnar, P., Graddis,  
 1283 N., Naeemi, M., Facer, B., Ho, A., Dolbeare, T., Blanchard, B., Dee,  
 1284 N., Wakeman, W., Hirokawa, K.E., Szafer, A., Sunkin, S.M., Oh, S.W.,  
 1285 Bernard, A., Phillips, J.W., Hawrylycz, M., Koch, C., Zeng, H., Harris,  
 1286 J.A., Ng, L.: The allen mouse brain common coordinate framework: a 3d  
 1287 reference atlas. *Cell* **181**(4), 936–953 (2020)

- [2] Paxinos, G., Franklin, K.B.: Paxinos and Franklin's the Mouse Brain in Stereotaxic Coordinates. Academic press, USA (2019) 1289  
1290
- [3] Christensen, G.E., Rabbitt, R.D., Miller, M.I.: Deformable templates using large deformation kinematics. *IEEE Transactions on Image Processing* **5**(10), 1435–1447 (1996). <https://doi.org/10.1109/83.536892> 1291  
1292  
1293
- [4] Grenander, U., Miller, M.I.: Computational Anatomy: An Emerging Discipline. *Applied Mathematics* **56**(4), 617–694 (1998) 1294  
1295
- [5] Thompson, P., Toga, A.: A framework for computational anatomy. *Comput Visual Sci* **5**, 13–34 (2002) 1296  
1297
- [6] Miller, M.I., Trouné, A., Younes, L.: On the metrics and Euler-Lagrange equations of computational anatomy. *Annual Review of Biomedical Engineering* **4**, 375–405 (2002). <https://doi.org/10.1146/annurev.bioeng.4.092101.125733> 1298  
1299  
1300  
1301
- [7] Avants, B., Gee, J.C.: Geodesic estimation for large deformation anatomical shape averaging and interpolation. *NeuroImage* **23**(SUPPL. 1), 139–150 (2004). <https://doi.org/10.1016/j.neuroimage.2004.07.010> 1302  
1303  
1304
- [8] Joshi, S., Davis, B., Jomier, M., Gerig, G.: Unbiased diffeomorphic atlas construction for computational anatomy. *NeuroImage* **23**, 151–160 (2004). <https://doi.org/10.1016/j.neuroimage.2004.07.068>. *Mathematics in Brain Imaging* 1305  
1306  
1307  
1308
- [9] Miller, M.I.: Computational anatomy: shape, growth, and atrophy comparison via diffeomorphisms. *NeuroImage* **23**, 19–33 (2004) 1309  
1310
- [10] Ashburner, J.: A fast diffeomorphic image registration algorithm. *NeuroImage* **38**(1), 95–113 (2007). <https://doi.org/10.1016/j.neuroimage.2007.07.007> 1311  
1312  
1313
- [11] Avants, B.B., Epstein, C.L., Grossman, M., Gee, J.C.: Symmetric diffeomorphic image registration with cross-correlation: Evaluating automated labeling of elderly and neurodegenerative brain. *Medical Image Analysis* **12**(1), 26–41 (2008). <https://doi.org/10.1016/j.media.2007.06.004> 1314  
1315  
1316  
1317
- [12] Vercauteren, T., Pennec, X., Perchant, A., Ayache, N.: Diffeomorphic demons: Efficient non-parametric image registration. *NeuroImage* **45**(1, Supplement 1), 61–72 (2009). <https://doi.org/10.1016/j.neuroimage.2008.10.040>. *Mathematics in Brain Imaging* 1318  
1319  
1320  
1321
- [13] Spherical demons: fast diffeomorphic landmark-free surface registration. *IEEE Trans Med Imaging* **29**(3), 650–68 (2010). <https://doi.org/10.1109/TMI.2009.2030797> 1322  
1323  
1324
- [14] Ashburner J, R.G.: Symmetric diffeomorphic modeling of longitudinal structural mri. *Front Neurosci* **5**(6) (2013). <https://doi.org/10.3389/fnins.2012.00197>. 1325  
1326  
1327
- [15] Miller, M., Tward, D., Trouné, A.: Molecular computational anatomy: Unifying the particle to tissue continuum via measure representations of the brain. *BME Frontiers* (2022) 1328  
1329  
1330
- [16] Miller, M.I., Tward, D.J., Troune, A.: Coarse-to-Fine Hamiltonian Dynamics of Hierarchical Flows in Computational Anatomy. In: *Proceedings of the IEEE/CVF Conference on Computer Vision and Pattern* 1331  
1332  
1333  
1334

- 1335 Recognition (CVPR) Workshops (2020)
- 1336 [17] Avants, B.B., Epstein, C.L., Grossman, M., Gee, J.C.: Symmetric  
1337 Diffeomorphic Image Registration with Cross-Correlation: Evaluating  
1338 Automated Labeling of Elderly and Neurodegenerative Brain
- 1339 [18] Heinrich, M.P., et al: MIND: Modality independent neighbourhood  
1340 descriptor for multi-modal deformable registration. *Medical Image Anal-*  
1341 *ysis* **16**(7), 1423–1435 (2012). [https://doi.org/10.1016/j.media.2012.05.](https://doi.org/10.1016/j.media.2012.05.008)  
1342 [008](https://doi.org/10.1016/j.media.2012.05.008)
- 1343 [19] Tward, D., et al: Diffeomorphic Registration With Intensity Trans-  
1344 formation and Missing Data: Application to 3D Digital Pathology of  
1345 Alzheimer’s Disease. *Frontiers in Neuroscience* **14**(February), 1–18 (2020).  
1346 <https://doi.org/10.3389/fnins.2020.00052>
- 1347 [20] Stouffer, K.M., Witter, M.P., Tward, D.J., Miller, M.I.: Projective dif-  
1348 feomorphic mapping of molecular digital pathology with tissue mri.  
1349 *Communications Engineering* **1**(1), 44 (2022)
- 1350 [21] Iglesias, J.E., et al: Joint registration and synthesis using a probabilis-  
1351 tic model for alignment of mri and histological sections. *Medical Image*  
1352 *Analysis* **50**, 127–144 (2018)
- 1353 [22] Yang, Q., et al: Mri cross-modality image-to-image translation. *Scientific*  
1354 *Reports* **10**(1), 1–18 (2020)
- 1355 [23] Islam, K.T., Wijewickrema, S., O’Leary, S.: A deep learning based frame-  
1356 work for the registration of three dimensional multi-modal medical images  
1357 of the head. *Scientific Reports* **11**(1), 1–13 (2021)
- 1358 [24] Biancalani, T., Scalia, G., Buffoni, L., Avasthi, R., Lu, Z., Sanger, A.,  
1359 Tokcan, N., Vanderburg, C.R., Segerstolpe, Å., Zhang, M., *et al.*: Deep  
1360 learning and alignment of spatially resolved single-cell transcriptomes  
1361 with tangram. *Nature methods* **18**(11), 1352–1362 (2021)
- 1362 [25] Vahid, M.R., Brown, E.L., Steen, C.B., Zhang, W., Jeon, H.S., Kang, M.,  
1363 Gentles, A.J., Newman, A.M.: High-resolution alignment of single-cell and  
1364 spatial transcriptomes with cytospace. *Nature Biotechnology*, 1–6 (2023)
- 1365 [26] Tian, L., Chen, F., Macosko, E.Z.: The expanding vistas of spatial  
1366 transcriptomics. *Nature Biotechnology* (2022). [https://doi.org/10.1038/](https://doi.org/10.1038/s41587-022-01448-2)  
1367 [s41587-022-01448-2](https://doi.org/10.1038/s41587-022-01448-2)
- 1368 [27] Miller, M.I., Trouvé, A., Younes, L.: Image Varifolds on Meshes for Map-  
1369 ping Spatial Transcriptomics. *arXiv* (2022). [https://doi.org/10.48550/](https://doi.org/10.48550/ARXIV.2208.08376)  
1370 [ARXIV.2208.08376](https://doi.org/10.48550/ARXIV.2208.08376). <https://arxiv.org/abs/2208.08376>
- 1371 [28] Chon, U., Vanselow, D.J., Cheng, K.C., Kim, Y.: Enhanced and unified  
1372 anatomical labeling for a common mouse brain atlas. *Nature communi-*  
1373 *cations* **10**(1), 5067 (2019)
- 1374 [29] Beg, M.F., Miller, M.I., Trouvé, A., Younes, L.: Computing large deformation  
1375 metric mappings via geodesic flows of diffeomorphisms. *International*  
1376 *Journal of Computer Vision* **61**(2), 139–157 (2005). [https://doi.org/10.](https://doi.org/10.1023/B:VISI.0000043755.93987.aa)  
1377 [1023/B:VISI.0000043755.93987.aa](https://doi.org/10.1023/B:VISI.0000043755.93987.aa)
- 1378 [30] Miller, M.I., Trouvé, A., Younes, L.: Geodesic shooting for computational  
1379 anatomy. *Journal of Mathematical Imaging and Vision* **24** (2006)
- 1380

- [31] Miller, M.I., Younes, L., Trouvé, A.: Diffeomorphometry and geodesic positioning systems for human anatomy. *Technology* **02**(01), 36–43 (2014). <https://doi.org/10.1142/s2339547814500010>
- [32] Joshi, S.C., Miller, M.I.: Landmark matching via large deformation diffeomorphisms. *IEEE Transactions on Image Processing* **9**(8), 1357–1370 (2000). <https://doi.org/10.1109/83.855431>
- [33] Yao, Z., van Velthoven, C.T., Kunst, M., Zhang, M., McMillen, D., Lee, C., Jung, W., Goldy, J., [...], Dee, N., Sunkin, S.M., Esposito, L., Hawrylycz, M.J., Waters, J., Ng, L., Smith, K.A., Bosiljka, T., Zhuang, X., Zeng, H.: A high-resolution transcriptomic and spatial atlas of cell types in the whole mouse brain. *bioRxiv*, 2023–03 (2023)
- [34] Charon, N., Trouvé, A.: The varifold representation of nonoriented shapes for diffeomorphic registration. *SIAM J. Imaging Sci.* **6**(4), 2547–2580 (2013) <https://arxiv.org/abs/1304.6108>. <https://doi.org/10.1137/130918885>
- [35] Moses, L., Pachter, L.: Museum of spatial transcriptomics. *Nature Methods* **19**(5), 534–546 (2022)
- [36] Vandenbon, A., Diez, D.: A clustering-independent method for finding differentially expressed genes in single-cell transcriptome data. *Nature communications* **11**(1), 4318 (2020)
- [37] Miller, B.F., Bambah-Mukku, D., Dulac, C., Zhuang, X., Fan, J.: Characterizing spatial gene expression heterogeneity in spatially resolved single-cell transcriptomic data with nonuniform cellular densities. *Genome research* **31**(10), 1843–1855 (2021)
- [38] Traag, V.A., Waltman, L., Van Eck, N.J.: From louvain to leiden: guaranteeing well-connected communities. *Scientific reports* **9**(1), 5233 (2019)
- [39] Petukhov, V., Xu, R.J., Soldatov, R.A., Cadinu, P., Khodosevich, K., Moffitt, J.R., Kharchenko, P.V.: Cell segmentation in imaging-based spatial transcriptomics. *Nature biotechnology* **40**(3), 345–354 (2022)
- [40] Littman, R., Hemminger, Z., Foreman, R., Arneson, D., Zhang, G., Gómez-Pinilla, F., Yang, X., Wollman, R.: Joint cell segmentation and cell type annotation for spatial transcriptomics. *Molecular systems biology* **17**(6), 10108 (2021)
- [41] Paxinos, G., Halliday, G., Watson, C., Kassem, M.S.: Atlas of the Developing Mouse Brain. Academic press, USA (2020)
- [42] Atlas, D.M.B.: Allen brain atlas, USA (2006)
- [43] Kim, Y.: KimLabDevCCFv001. Mendeley Data (2022). <https://doi.org/10.17632/2svx788ddf.1>
- [44] Leergaard, T., Kleven, H., Bjerke, I., Clascá, F., Groenewegen, H., Bjaalie, J.: Waxholm space atlas of the rat brain: A 3d atlas supporting data analysis and integration (2023)
- [45] Garin, C.M., Garin, M., Silenzi, L., Jaffe, R., Constantinidis, C.: Multi-level atlas comparisons reveal divergent evolution of the primate brain. *Proceedings of the National Academy of Sciences* **119**(25), 2202491119 (2022)



- 1427 (2022)
- 1428 [46] Beauchamp, A., Yee, Y., Darwin, B.C., Raznahan, A., Mars, R.B., Lerch,  
1429 J.P.: Whole-brain comparison of rodent and human brains using spatial  
1430 transcriptomics. *Elife* **11**, 79418 (2022)
- 1431 [47] Rodriques, S.G., Stickels, R.R., Goeva, A., Martin, C.A., Murray, E.,  
1432 Vanderburg, C.R., Welch, J., Chen, L.M., Chen, F., Macosko, E.Z.: Slide-  
1433 seq: A scalable technology for measuring genome-wide expression at high  
1434 spatial resolution. *Science* **363**(6434), 1463–1467 (2019)
- 1435 [48] Chen, X., Sun, Y.-C., Zhan, H., Keschull, J.M., Fischer, S., Matho, K.,  
1436 Huang, Z.J., Gillis, J., Zador, A.M.: High-throughput mapping of long-  
1437 range neuronal projection using in situ sequencing. *Cell* **179**(3), 772–786  
1438 (2019)
- 1439 [49] Cheng, S.-W., Dey, T.K., Shewchuk, J., Sahni, S.: *Delaunay Mesh*  
1440 *Generation*. CRC Press Boca Raton, Florida (2013)
- 1441 [50] Dupuis, P., Grenander, U., Miller, M.I.: Variational problems on flows of  
1442 diffeomorphisms for image matching. *Quarterly of Applied Mathematics*  
1443 **56**(3), 587–600 (1998)
- 1444 [51] Stellato, B., Banjac, G., Goulart, P., Bemporad, A., Boyd, S.: OSQP:  
1445 an operator splitting solver for quadratic programs. *Mathematical Pro-*  
1446 *gramming Computation* **12**(4), 637–672 (2020). [https://doi.org/10.1007/  
1447 s12532-020-00179-2](https://doi.org/10.1007/s12532-020-00179-2)
- 1448
- 1449
- 1450
- 1451
- 1452
- 1453
- 1454
- 1455
- 1456
- 1457
- 1458
- 1459
- 1460
- 1461
- 1462
- 1463
- 1464
- 1465
- 1466
- 1467
- 1468
- 1469
- 1470
- 1471
- 1472
